# Supplementary material for: Duplex One-Step RT-qPCR Assays for Simultaneous Detection of Genomic and Subgenomic RNAs of SARS-CoV-2 Variants
Source: MDPI journal article supplement (doi:10.3390/v14051066), 2022-05-17
Supplement: s1 [file s1]

**Supplemental Table S4. *gORF1a* + *sgORF3a* duplex RT-qPCR results for RNA extracted longitudinally from the supernatant of TMPRSS2 Vero E6 cells infected with SARS-CoV-2, delta variant.**

| <b>Time (h)</b> | <b><i>gORF1a</i><br/>(Ct Mean)</b> | <b><i>gORF1a</i><br/>(Ct SD)</b> | <b><i>gORF1a</i><br/>(5 x log<br/>copies/μg)</b> | <b><i>sgORF3a</i><br/>(Ct Mean)</b> | <b><i>sgORF3a</i><br/>(Ct SD)</b> | <b><i>sgORF3a</i><br/>(5 x log<br/>copies/μg)</b> |
|-----------------|------------------------------------|----------------------------------|--------------------------------------------------|-------------------------------------|-----------------------------------|---------------------------------------------------|
| 2               | 34.023                             | 0.43                             | 5.050120048                                      | 37.462                              | -                                 | 4.811515152                                       |
| 4               | 33.349                             | 0.576                            | 5.25240096                                       | 36.91                               | 1.613                             | 4.978787879                                       |
| 6               | 30.779                             | 0.403                            | 6.023709484                                      | 31.627                              | 0.539                             | 6.57969697                                        |
| 8               | 26.773                             | 0.094                            | 7.225990396                                      | 27.517                              | 0.102                             | 7.825151515                                       |
| 12              | 23.041                             | 0.068                            | 8.346038415                                      | 24.264                              | 0.049                             | 8.810909091                                       |
| 16              | 21.128                             | 0.018                            | 8.920168067                                      | 22.713                              | 0.067                             | 9.280909091                                       |
| 20              | 19.796                             | 0.053                            | 9.319927971                                      | 21.446                              | 0.025                             | 9.664848485                                       |
| 24              | 19.6                               | 0.164                            | 9.378751501                                      | 22.894                              | 0.206                             | 9.226060606                                       |
| 30              | 17.611                             | 0.065                            | 9.975690276                                      | 20.2                                | 0.111                             | 10.04242424                                       |
| 36              | 19.352                             | 0                                | 9.453181273                                      | 23.457                              | 0.029                             | 9.055454545                                       |
| 42              | 19.833                             | 0.027                            | 9.308823529                                      | 22.614                              | 0.019                             | 9.310909091                                       |
| 48              | 20.792                             | 1.396                            | 9.021008403                                      | 22.742                              | 0.022                             | 9.272121212                                       |

*gORF1a* = genomic ORF1a ; *sgORF3a* = subgenomic ORF3a; RT-qPCR = real-time reverse transcription PCR; TMPRSS2 = human transmembrane serine protease 2; SARS-CoV-2 = severe acute respiratory syndrome coronavirus 2.
