# Supplementary material for: Duplex One-Step RT-qPCR Assays for Simultaneous Detection of Genomic and Subgenomic RNAs of SARS-CoV-2 Variants
Source: MDPI journal article supplement (doi:10.3390/v14051066), 2022-05-17
Supplement: s1 [file s1]

**Supplemental Table S2. *gORF1a* + *sgS* duplex RT-qPCR results for RNA extracted longitudinally from the supernatant of TMPRSS2 Vero E6 cells infected with SARS-CoV-2, delta variant.**

| <b>Time (h)</b> | <b><i>gORF1a</i><br/>(Ct Mean)</b> | <b><i>gORF1a</i><br/>(Ct SD)</b> | <b><i>gORF1a</i><br/>(5 x log<br/>copies/μg)</b> | <b><i>sgS</i><br/>(Ct Mean)</b> | <b><i>sgS</i><br/>(Ct SD)</b> | <b><i>sgS</i><br/>(5 x log<br/>copies/μg)</b> |
|-----------------|------------------------------------|----------------------------------|--------------------------------------------------|---------------------------------|-------------------------------|-----------------------------------------------|
| 2               | 35.223                             | 0.148                            | 4.98406015                                       | -                               |                               |                                               |
| 4               | 34.871                             | 0.324                            | 5.089924812                                      | 37.945                          | 0.733                         | 4.434421535                                   |
| 6               | 31.881                             | 0.176                            | 5.989172932                                      | 33.095                          | 0.146                         | 5.823310424                                   |
| 8               | 27.84                              | 0.014                            | 7.204511278                                      | 29.08                           | 0.028                         | 6.973081329                                   |
| 12              | 24.145                             | 0.022                            | 8.315789474                                      | 25.899                          | 0.06                          | 7.884020619                                   |
| 16              | 22.179                             | 0.022                            | 8.907067669                                      | 24.264                          | 0.043                         | 8.352233677                                   |
| 20              | 20.786                             | 0.041                            | 9.326015038                                      | 23.189                          | 0.024                         | 8.660080183                                   |
| 24              | 20.741                             | 0.061                            | 9.339548872                                      | 25.979                          | 0.178                         | 7.861111111                                   |
| 30              | 18.625                             | 0.012                            | 9.97593985                                       | 22.508                          | 0.093                         | 8.855097365                                   |
| 36              | 20.359                             | 0.019                            | 9.45443609                                       | 34.77                           | 0.075                         | 5.343642612                                   |
| 42              | 20.919                             | 0.111                            | 9.286015038                                      | 25.196                          | 0.054                         | 8.085337915                                   |
| 48              | 20.981                             | 0.082                            | 9.267368421                                      | 25.087                          |                               | 8.116552119                                   |

*gORF1a* = genomic ORF1a ; *sgS* = subgenomic spike RT-qPCR = real-time reverse transcription PCR;

TMPRSS2 = human transmembrane serine protease 2; SARS-CoV-2 = severe acute respiratory syndrome coronavirus 2.
