# Supplementary material for: Duplex One-Step RT-qPCR Assays for Simultaneous Detection of Genomic and Subgenomic RNAs of SARS-CoV-2 Variants
Source: MDPI journal article supplement (doi:10.3390/v14051066), 2022-05-17
Supplement: s1 [file s1]

**Supplemental Table S3. *gORF1a* + *sgORF3a* duplex RT-qPCR results for RNA extracted longitudinally from the supernatant of TMPRSS2 Vero E6 cells infected with SARS-CoV-2 Washington strain.**

| <b>Time (h)</b> | <b><i>gORF1a</i><br/>(Ct Mean)</b> | <b><i>gORF1a</i><br/>(Ct SD)</b> | <b><i>gORF1a</i><br/>(5 x log<br/>copies/μg)</b> | <b><i>sgORF3a</i><br/>(Ct Mean)</b> | <b><i>sgORF3a</i><br/>(Ct SD)</b> | <b><i>sgORF3a</i><br/>(5 x log<br/>copies/μg)</b> |
|-----------------|------------------------------------|----------------------------------|--------------------------------------------------|-------------------------------------|-----------------------------------|---------------------------------------------------|
| 2               | 34.603                             | 1.008                            | 4.87605042                                       | 35.496                              | -                                 | 5.407272727                                       |
| 4               | 27.494                             | 0.314                            | 7.009603842                                      | 27.678                              | 0.294                             | 7.776363636                                       |
| 6               | 23.494                             | 0.071                            | 8.210084034                                      | 23.845                              | 0.021                             | 8.937878788                                       |
| 8               | 22.443                             | 0.07                             | 8.525510204                                      | 23.154                              | 0.012                             | 9.147272727                                       |
| 12              | 20.32                              | 0.033                            | 9.162665066                                      | 21.227                              | 0.089                             | 9.731212121                                       |
| 16              | 18.525                             | 0.093                            | 9.701380552                                      | 19.923                              | 0.085                             | 10.12636364                                       |
| 20              | 17.904                             | 0.02                             | 9.887755102                                      | 19.566                              | 0.054                             | 10.23454545                                       |
| 24              | 17.907                             | 0.03                             | 9.886854742                                      | 20.315                              | 0.036                             | 10.00757576                                       |
| 30              | 18.319                             | 0.004                            | 9.763205282                                      | 20.53                               | 0.041                             | 9.942424242                                       |
| 36              | 19.464                             | 0.068                            | 9.419567827                                      | 20.971                              | 0.039                             | 9.808787879                                       |
| 42              | 19.343                             | 0.053                            | 9.455882353                                      | 21.788                              | 0.026                             | 9.561212121                                       |
| 48              | 19.288                             | 0.045                            | 9.472388956                                      | 22.077                              | 0.029                             | 9.473636364                                       |

*gORF1a* = genomic ORF1a ; *sgORF3a* = subgenomic ORF3a; RT-qPCR = real-time reverse

transcription PCR; TMPRSS2 = human transmembrane serine protease 2; SARS-CoV-2 = severe acute respiratory syndrome coronavirus 2.
