# Supplementary material for: Duplex One-Step RT-qPCR Assays for Simultaneous Detection of Genomic and Subgenomic RNAs of SARS-CoV-2 Variants
Source: MDPI journal article supplement (doi:10.3390/v14051066), 2022-05-17
Supplement: s1 [file s1]

**Supplemental Table S1. *gORF1a* + *sgS* duplex RT-qPCR results for RNA extracted longitudinally from the supernatant of TMPRSS2 Vero E6 cells infected with SARS-CoV-2 Washington strain.**

| <b>Time<br/>(Hours)</b> | <b><i>gORF1a</i><br/>(Ct<br/>Mean)</b> | <b><i>gORF1a</i><br/>(Ct SD)</b> | <b><i>gORF1a</i><br/>(5 x log<br/>copies/μg)</b> | <b><i>sgS</i><br/>(Ct<br/>Mean)</b> | <b><i>sgS</i><br/>(Ct SD)</b> | <b><i>sgS</i><br/>(5 x log<br/>copies/μg)</b> |
|-------------------------|----------------------------------------|----------------------------------|--------------------------------------------------|-------------------------------------|-------------------------------|-----------------------------------------------|
| 2                       | 35.956                                 | 1.683                            | 4.763609023                                      | 37.549                              |                               | 4.547823597                                   |
| 4                       | 28.326                                 | 0.065                            | 7.058345865                                      | 29.152                              | 0.093                         | 6.952462772                                   |
| 6                       | 24.412                                 | 0.053                            | 8.235488722                                      | 25.528                              | 0.019                         | 7.990263459                                   |
| 8                       | 23.463                                 | 0.149                            | 8.520902256                                      | 25.04                               | 0.118                         | 8.130011455                                   |
| 12                      | 21.34                                  | 0.048                            | 9.159398496                                      | 23.198                              | 0.11                          | 8.657502864                                   |
| 16                      | 19.488                                 | 0.098                            | 9.716390977                                      | 21.772                              | 0.025                         | 9.065864834                                   |
| 20                      | 18.888                                 | 0.038                            | 9.896842105                                      | 21.691                              | 0.069                         | 9.08906071                                    |
| 24                      | 18.888                                 | 0.012                            | 9.896842105                                      | 22.86                               | 0.085                         | 8.754295533                                   |
| 30                      | 19.331                                 | 0.011                            | 9.763609023                                      | 23.454                              | 0.066                         | 8.58419244                                    |
| 36                      | 20.452                                 | 0.051                            | 9.426466165                                      | 23.45                               | 0.024                         | 8.585337915                                   |
| 42                      | 20.293                                 | 0.075                            | 9.474285714                                      | 24.762                              | 0.167                         | 8.209621993                                   |
| 48                      | 20.229                                 | 0.055                            | 9.493533835                                      | 24.743                              | 0.222                         | 8.215063001                                   |

*gORF1a* = genomic ORF1a ; *sgS* = subgenomic spike; ; RT-qPCR = real-time reverse transcription PCR; TMPRSS2 = human transmembrane serine protease 2; SARS-CoV-2 = severe acute respiratory syndrome coronavirus 2.
